# Supplementary material for: A new organic–inorganic hybrid electrolyte based on polyacrylonitrile, polyether diamine and alkoxysilanes for lithium ion batteries: synthesis, structural properties, and electrochemical characterization
Source: Royal Society of Chemistry journal article supplement (doi:10.1039/c3ra47695b), 2014-01-01
Supplement: c3ra47695b1.pdf [file c3ra47695b1.pdf]

## Electronic Supplementary Information for

### **A new organic-inorganic hybrid electrolyte based on polyacrylonitrile, polyether diamine and alkoxy silanes for lithium ion batteries: synthesis, structural properties, and electrochemical characterizations**

Yu-Chi Pan,<sup>a</sup> Diganta Saikia,<sup>a</sup> Jason Fang,<sup>b</sup> Li-Duan Tsai,<sup>b</sup> George T. K. Fey<sup>c</sup> and Hsien-Ming Kao\*<sup>a</sup>

<sup>a</sup>Department of Chemistry, National Central University, Jhongli, Taiwan 32054, R.O.C.

<sup>b</sup>Department of Fuel Cell Materials and Advanced Capacitors, Division of Energy Storage Materials and Technology, Material and Chemical Laboratories, Industrial Technology Research Institute, Hsin-Chu 300, R.O.C.

<sup>c</sup>Department of Chemical and Materials Engineering, National Central University, Jhongli, Taiwan 32054, R.O.C.

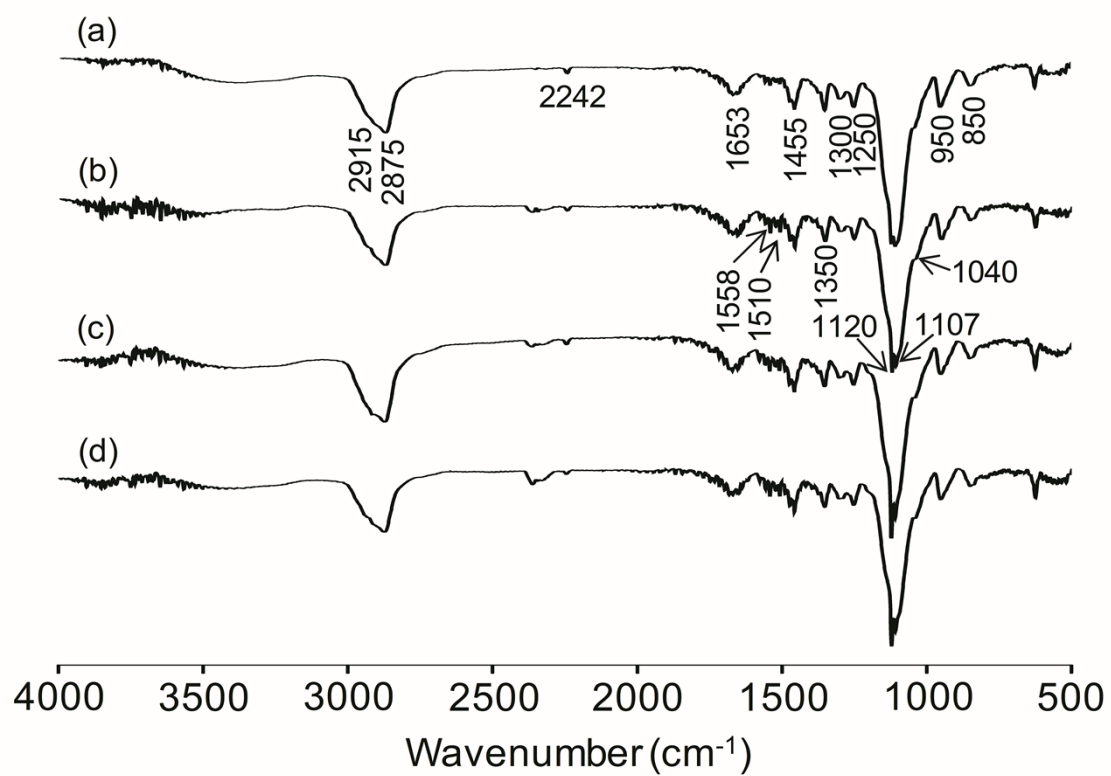

**Fig. S1.** FTIR spectra of PAGE- $x$  hybrid electrolytes, where  $x = 15$  (a), 18 (b), 21 (c), and 24 (d).

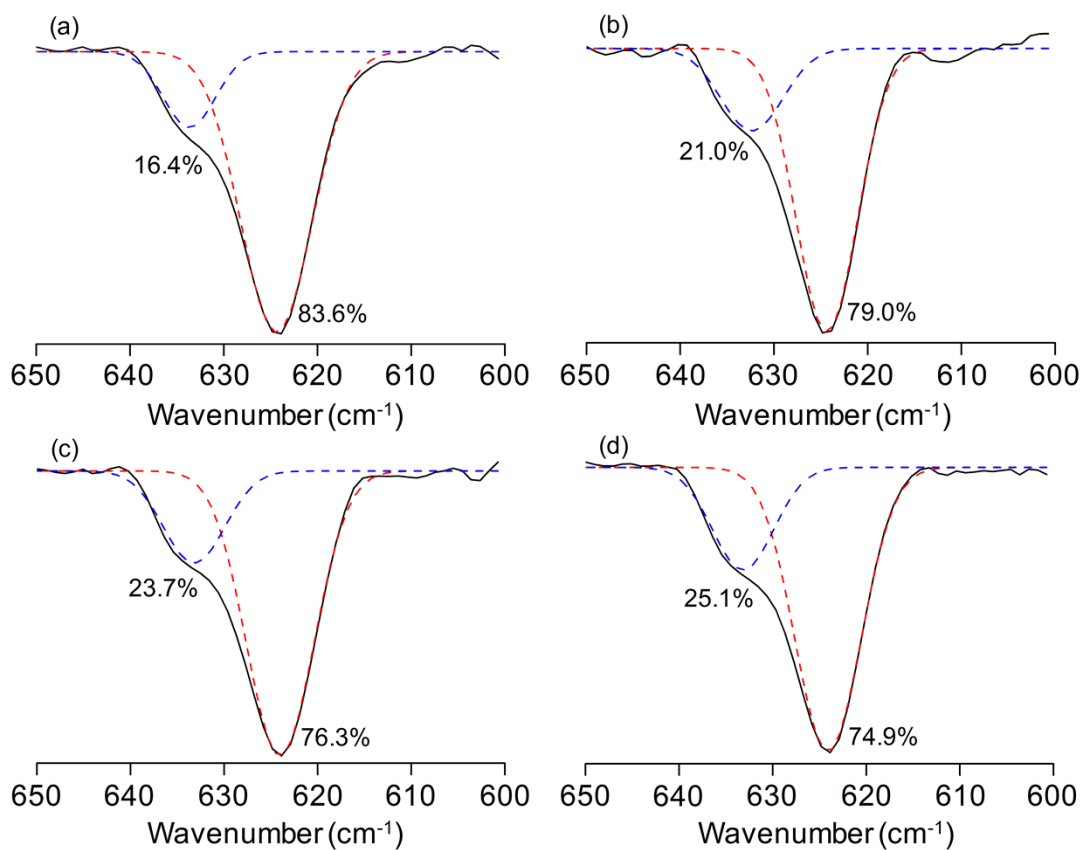

**Fig. S2.** FTIR deconvolution results of PAGE-*x* hybrid electrolytes in the range of 600–650 cm<sup>-1</sup> with various amounts of Li salt, where *x* = 15 (a), 18 (b), 21 (c), and 24 (d).

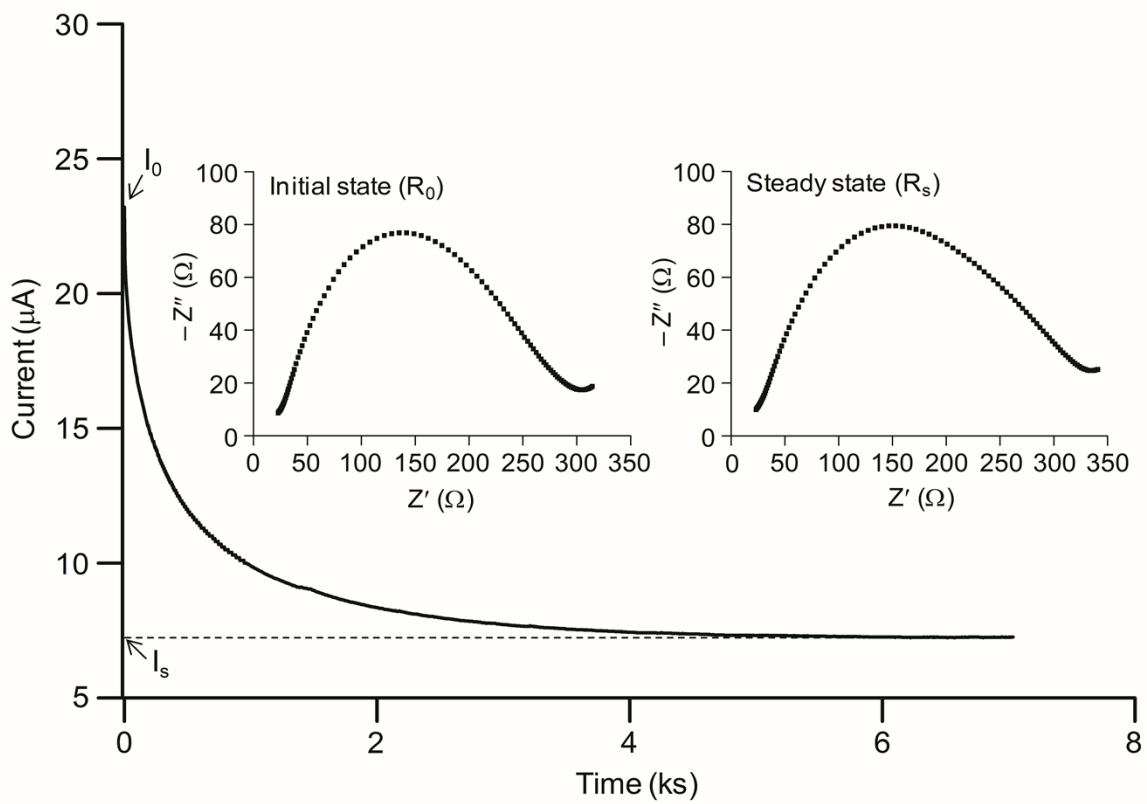

**Fig. S3.** Typical depolarization curve of PAGE-24 hybrid electrolyte.
